# Supplementary material for: Photochemical synthesis of silver nanoprisms via green LED irradiation and evaluation of SERS activity
Source: publisher site journal article supplement (doi:10.3762/bjnano.16.103), 2025-08-26
Supplement: Additional file 1 [file 2190-4286-16-103-S1.pdf]

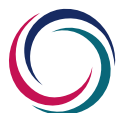

## Supporting Information

for

### **Photochemical synthesis of silver nanoprisms via green LED irradiation and evaluation of SERS activity**

Tuan Anh Mai-Ngoc, Nhi Kieu Vo, Cong Danh Nguyen, Thi Kim Xuan Nguyen  
and Thanh Sinh Do

*Beilstein J. Nanotechnol.* **2025**, *16*, 1417–1427. doi:10.3762/bjnano.16.103

## Additional figures and tables

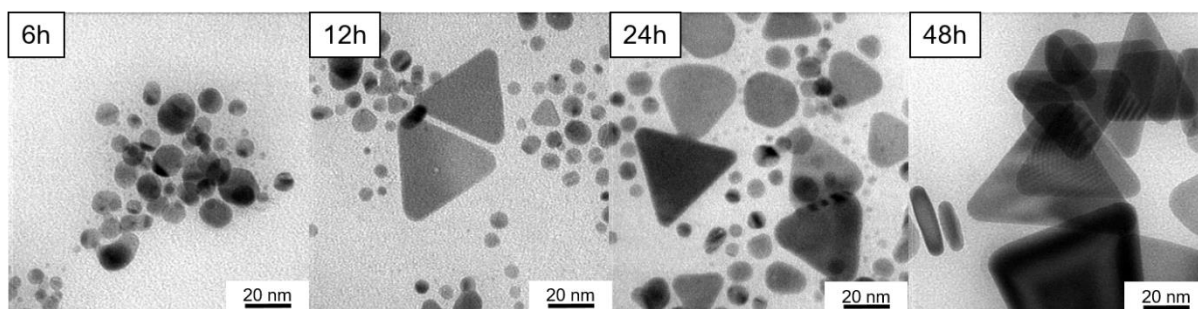

**Figure S1:** TEM images of the samples at a magnification of 200,000 after 6, 12, 24 and 48 hours of LED irradiation.

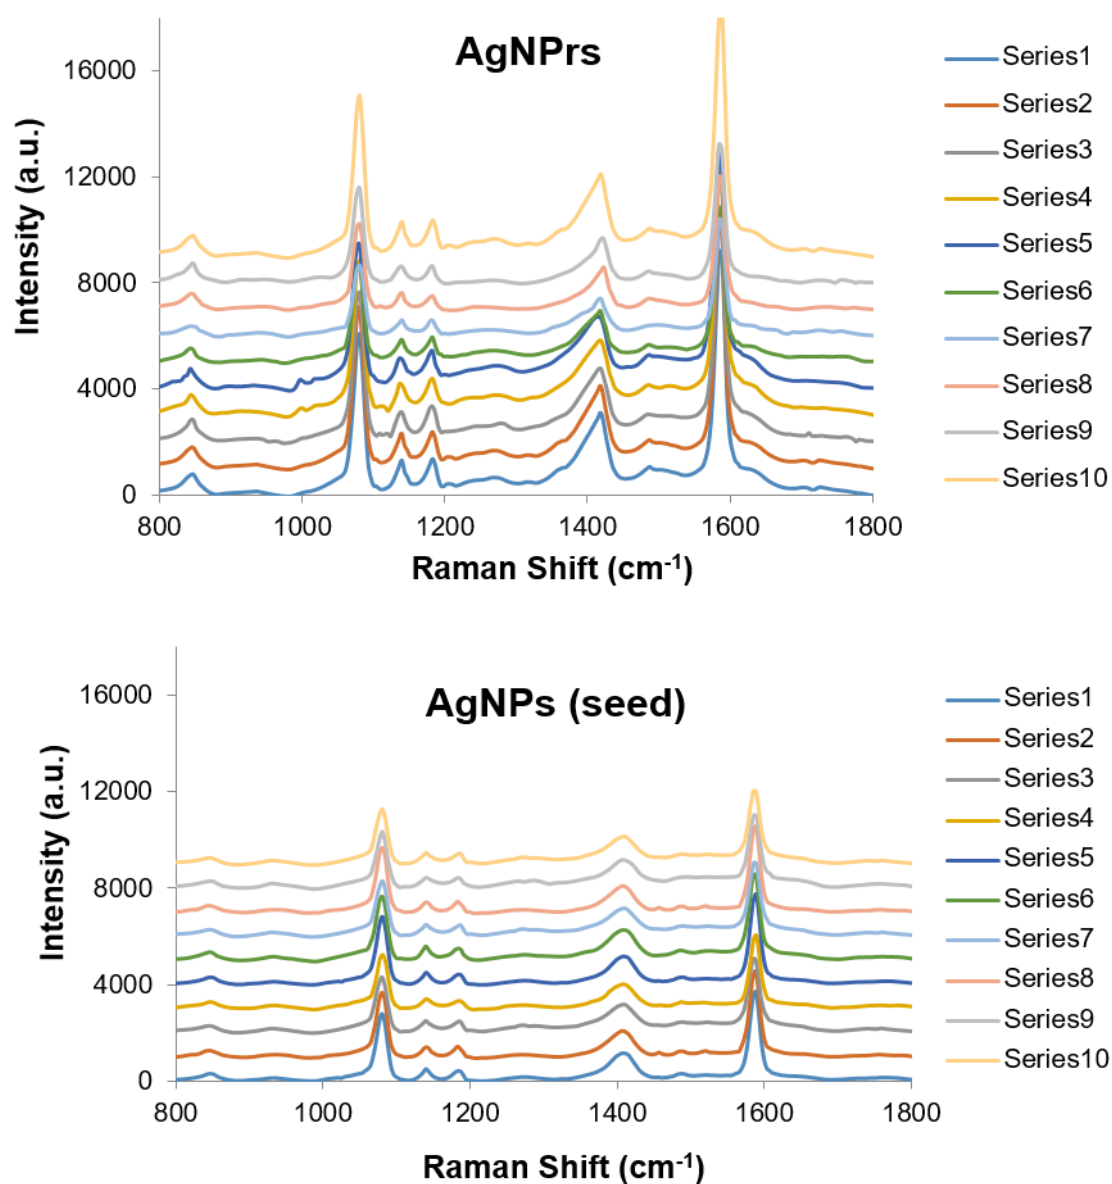

**Figure S2:** SERS spectra of 4-MBA at  $10^{-5}$  M, enhanced by (a) AgNPrs and (b) AgNPs, recorded 10 different measurements.

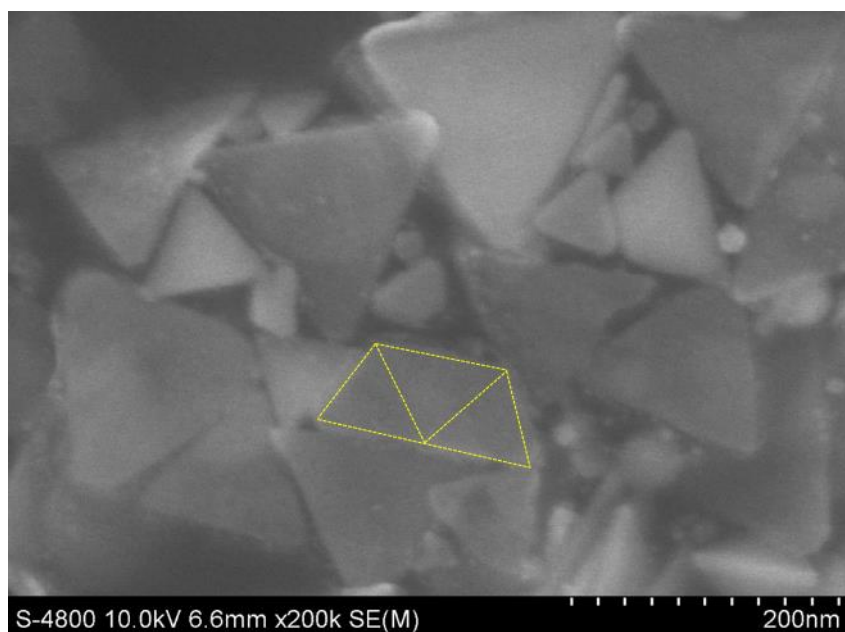

**Figure S3:** FE-SEM image of AgNPs at 72 h LED irradiation: a trapezoid-shaped silver nanoparticles was seen. An additional small AgNPs is required to assemble an AgNPs with twice the original size (via Mechanism 2 in Figure 6).

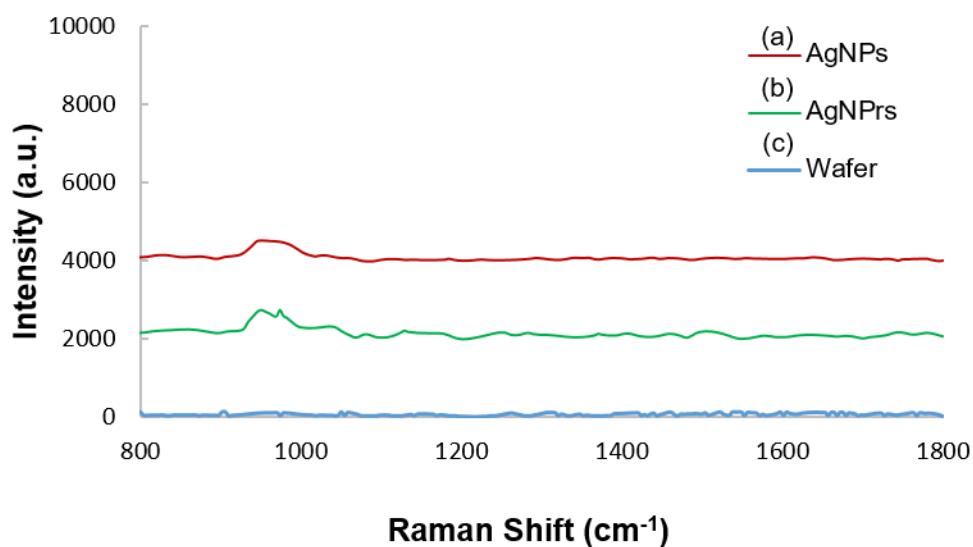

**Figure S4:** Raman spectra of (a) AgNPs, (b) AgNPs an (c) wafer.

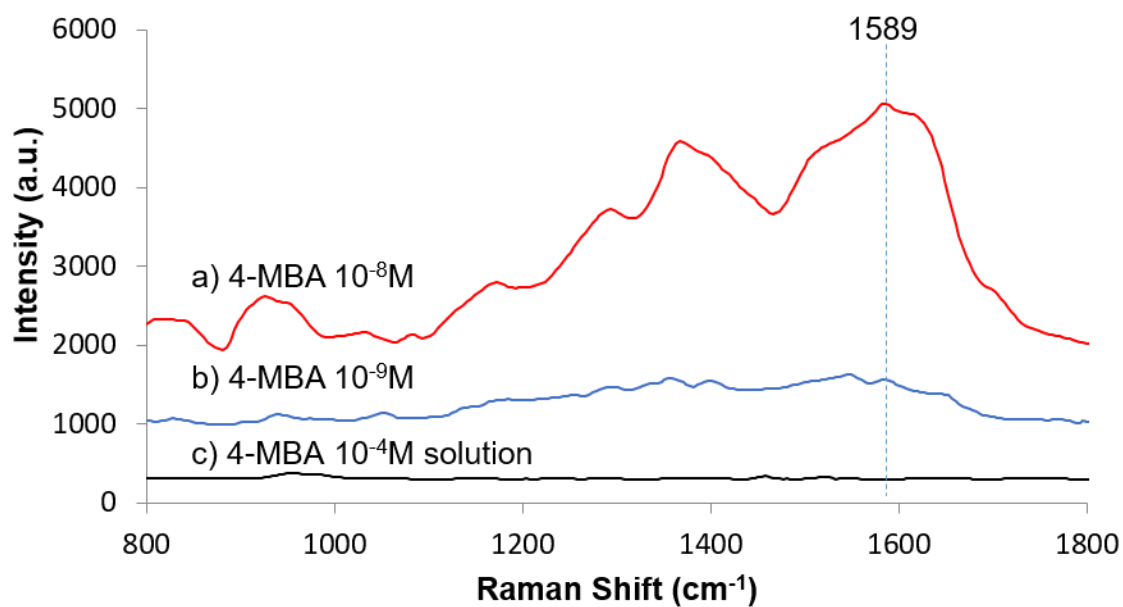

**Figure S5:** SERS spectra of (a) 4-MBA  $10^{-8}$  M, (b) 4-MBA  $10^{-9}$  M and (c) Raman spectrum of 4-MBA  $10^{-4}$  M (not enhanced by AgNPRs).

**Table S1:** UV–vis absorption peak of silver nanoparticles at different LED irradiation times.

| Samples | Peak OPQ<br>(nm) | Peak IPQ<br>(nm) | Peak IPD<br>(nm) |
|---------|------------------|------------------|------------------|
| 6 h     | -                | -                | 402              |
| 12 h    | -                | -                | 405<br>650       |
| 24 h    | -                | -                | 405<br>662       |
| 48 h    | 333              | 420              | 654              |
| 72 h    | 333              | 440              | 604              |
| 96 h    | 333              | 440              | 600              |
